# Supplementary material for: Gut microbiota comparison of vaginally and cesarean born infants exclusively breastfed by mothers secreting α1–2 fucosylated oligosaccharides in breast milk
Source: PubMed Central journal article supplement (PMC7870049; doi:10.1371/journal.pone.0246839), 2021-02-08

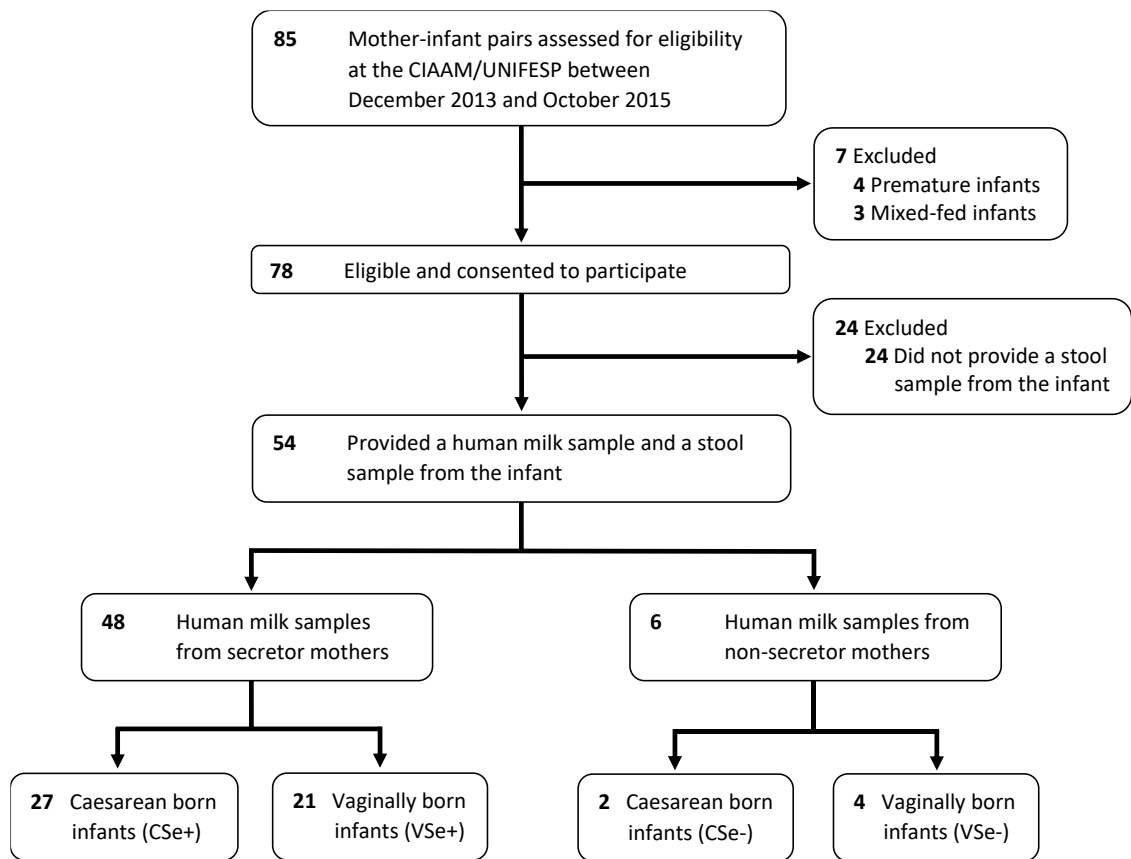

Supplement: pone.0246839.s001.pdf [file pone.0246839.s001.pdf]
