# Supplementary material for: Gut microbiota comparison of vaginally and cesarean born infants exclusively breastfed by mothers secreting α1–2 fucosylated oligosaccharides in breast milk
Source: PubMed Central journal article supplement (PMC7870049; doi:10.1371/journal.pone.0246839), 2021-02-08
Supplement: pone.0246839.s003.pdf [file pone.0246839.s003.pdf]

| Genera/species                    | Sequences (5' – 3')                                        | Reference |
|-----------------------------------|------------------------------------------------------------|-----------|
| <i>B. bifidum</i>                 | F: CTCCTGGAAACGGGTGG<br>R: GGTGTTCTTCCCGATATCTACA          | [1]       |
| <i>B. infantis</i>                | F: CGCGAGCAAACAATGGTT<br>R: AACGATCGAAACGAACAATAGAGTT      | [2]       |
| <i>B. longum</i>                  | F: TGAAGACGTCGTTGGCTTT<br>R: ATCGCGCCAGGCAAAA              | [2]       |
| <i>B. breve</i>                   | F: GTGGTGGCTTGAGAACTGGATAG<br>R: CAAAACGATCGAAACAAACACTAAA | [2]       |
| <i>B. catenulatum</i>             | F: GTGGACGCGAGCAATGC<br>R: AATAGAGCCTGGCGAAATCG            | [2]       |
| <i>B. adolescentis</i>            | F: ATAGTGGACGCGAGCAAGAGA<br>R: TTGAAGAGTTTGGCGAAATCG       | [2]       |
| <i>Bacteroides fragilis</i>       | F: ATAGCCTTTCGAAAGRAAGAT<br>R: CCAGTATCAACTGCAATTTTA       | [3]       |
| <i>Clostridium difficile</i>      | F: TTGAGCGATTTACTTCGGTAAAGA<br>R: CCATTCTGTACTGGCTCACCT    | [1]       |
| <i>Escherichia coli</i>           | F: CATGCCGCGTGTATGAAGAA<br>R: CGGGTAACGTCAATGAGCAAA        | [4]       |
| <i>Methanobrevibacter smithii</i> | F: GAAAGCGGAGGTCCTGAA<br>R: ACTGAAAAACCTCCGCAAAC           | [5]       |

## References

- Schäffler H, Kaschitzki A, Alberts C, Bodammer P, Bannert K, Köller T, et al. Alterations in the mucosa-associated bacterial composition in Crohn's disease: a pilot study. *Int J Colorectal Dis* [Internet]. 2016;31:961–71. Available from: <http://link.springer.com/10.1007/s00384-016-2548-z>
- Haarman M, Knol J. Quantitative real-time PCR assays to identify and quantify fecal Bifidobacterium species in infants receiving a prebiotic infant formula. *Appl Environ Microbiol* [Internet]. 2005 [cited 2013 Jul 31];71:2318–24. Available from: <http://aem.asm.org/content/71/5/2318.short>
- Matsuki T, Watanabe K, Fujimoto J, Miyamoto Y, Takada T, Matsumoto K, et al. Development of 16S rRNA-gene-targeted group-specific primers for the detection and identification of predominant bacteria in human feces. *Appl Environ Microbiol* [Internet]. 2002 [cited 2013 Aug 1];68:5445–51. Available from:

<http://aem.asm.org/content/68/11/5445.short>

4. Huijsdens XW, Linskens RK, Mak M, Meuwissen SGM, Vandenbroucke-Grauls CMJE, Savelkoul PHM. Quantification of bacteria adherent to gastrointestinal mucosa by real-time PCR. *J Clin Microbiol* [Internet]. 2002;40:4423–7. Available from: <http://www.ncbi.nlm.nih.gov/pubmed/12454130>

5. Johnston C, Ufnar JA, Griffith JF, Gooch JA, Stewart JR. A real-time qPCR assay for the detection of the *nifH* gene of *Methanobrevibacter smithii*, a potential indicator of sewage pollution. *J Appl Microbiol* [Internet]. 2010;109:1946–56. Available from: <http://www.ncbi.nlm.nih.gov/pubmed/21070516>
